# Supplementary material for: ABA-Induced Vegetative Diaspore Formation in Physcomitrella patens
Source: Front Plant Sci. 2019 Mar 19;10:315. doi: 10.3389/fpls.2019.00315 (PMC6433873; doi:10.3389/fpls.2019.00315)
Supplement: TABLE S7 — Genes identified as regulated by different treatments in different studies. [file Table_7.XLSX]

## Sheet: ABA_TAPs
Table S7: Genes identified as regulated by different treatments in different studies.
Phypa-ID	v1.6 CGI	v3.3 CGI	Description	TAP family	Transcription factor (TF) / Transcription regulator (TR)	ABA/salt Richardt et al.	ABA-RE Timmerhaus et al.	UV-B Wolf et al.	qPCR validation Wolf et al.	ABA (this publication)			Dehydration Hiss et al.	Cold, Beike et al.				Time series analysis (this publication)
						differentially expressed	differentially expressed	differentially expressed	differentially expressed	30 min	60 min	180 min		0h vs. 1h	0h vs. 3h	0h vs. 8h	0h vs. 24h	differentially expressed
Phypa_89256	Pp1s180_121V6.1	Pp3c6_5340V3.1	similar to Avr9/Cf-9 rapidly elicited protein 111B [Oryza sativa (japonica cultivar-group)]	AP2/EREBP	TF	yes				+	+	+	+					yes
Phypa_90222	Pp1s194_122V6.1			AP2/EREBP	TF	yes		yes		+	+	+	+					yes
Phypa_114178	Pp1s9_61V6.1		Dehydration-responsive element-binding protein 2A (DREB2A protein) [Arabidopsis thaliana]	AP2/EREBP	TF		yes				+	+						yes
Phypa_206280	Pp1s33_11V6.1	Pp3c18_22220V3.1	AP2 domain-containing transcription factor, putative [Arabidopsis thaliana]	AP2/EREBP	TF	yes						+						yes
Phypa_172642	Pp1s370_52V6.1		argonaute family member	Argonaute	TR	yes				+	+	+	+					yes
Phypa_58108	Pp1s90_78V6.1	Pp3c9_910V3.1	Transcription factor BIM1 (BES1-interacting Myc-like protein 1) (Transcription factor EN 126) (AtbHLH 46) [Arabidopsis thaliana]	bHLH	TF						+	+						yes
Phypa_65508	Pp1s6_413V6.2		Protein SPATULA [no tax name]	bHLH	TF	yes						+						yes
Phypa_188441	Pp1s86_10V6.1	Pp3c1_14480V3.1	sll2 protein	C2C2_CO-like	TF		yes				+	+
Phypa_124894	Pp1s52_183V6.1			C2C2_CO-like	TF	yes	yes					+						yes
Phypa_170119	Pp1s232_64V6.1	Pp3c11_4920V3.1	Dof zinc finger protein DOF3.3 (AtDOF3.3) (H-protein promoter-binding factor 2a) [Arabidopsis thaliana]	C2C2_Dof	TF	yes					+	+						yes
Phypa_208578	Pp1s47_110V6.1	Pp3c3_22990V3.1	Dof-type zinc finger domain-containing protein [Arabidopsis thaliana]	C2C2_Dof	TF	yes						+						yes
Phypa_147053	Pp1s253_40V6.1	Pp3c15_25860V3.1	CCAAT-box binding transcription factor subunit B (NF-YB) (HAP3 ) (AHAP3) family [Arabidopsis thaliana]	CCAAT_HAP3	TF	yes						+
Phypa_159042	Pp1s9_106V6.1	Pp3c20_5650V3.1	transcription factor, putative [Arabidopsis thaliana]	CCAAT_HAP5	TF	yes		yes				+
Phypa_125244	Pp1s53_233V6.1	Pp3c6_24460V3.1		HD-Zip	TF						+	+
Phypa_116441	Pp1s16_132V6.1		zinc-binding family protein [Arabidopsis thaliana]	PLATZ	TF		yes					+
Phypa_164514	Pp1s70_119V6.1	Pp3c12_15060V3.1	zinc-binding family protein [Arabidopsis thaliana]	PLATZ	TF		yes				+	+	+					yes
Phypa_86427	Pp1s145_130V6.1	Pp3c10_15660V3.1	Plastid sigma factor PpSIG5	Sigma70-like	TR	yes						+						yes
Phypa_118932	Pp1s26_5V6.1			C2C2_CO-like	TF							+			-	-		yes
Phypa_141045	Pp1s173_134V6.1	Pp3c17_16550V3.1	Arabinogalactan endo-1,4-beta-galactosidase (Endo-1,4-beta-galactanase) (Galactanase) [Corynascus heterothallicus]	Argonaute	TR	yes						+						yes
Phypa_163821	Pp1s60_228V6.1	Pp3c4_24710V3.1	proteophosphoglycan ppg1 [Leishmania major]	AP2/EREBP	TF	yes		yes				-				+		yes
Phypa_169502	Pp1s211_77V6.1	Pp3c15_740V3.1	F25I24.170; UDP-glucose 4-epimerase, putative / UDP-galactose 4-epimerase, putative / Galactowaldenase, putative [Arabidopsis thaliana]	bHLH	TF							+					+	yes
Phypa_49171	Pp1s185_120V6.1	Pp3c18_6880V3.1	F19G10.23; expressed protein [Arabidopsis thaliana]	bHLH	TF	yes						+						yes
Phypa_158812	Pp1s7_115V6.1		abscisic acid-insensitive protein 3 (ABI3) [Arabidopsis thaliana]	ABI3/VP1	TF	yes					+						+	yes
Phypa_168363	Pp1s173_144V6.1	Pp3c17_16470V3.1	Protein viviparous homolog [Oryza sativa]	ABI3/VP1	TF	yes	yes				+						+	yes
Phypa_126548	Pp1s60_269V6.1	Pp3c4_25130V3.1	AP2 domain-containing transcription factor TINY, putative [Arabidopsis thaliana]	AP2/EREBP	TF	yes		yes	yes		+		+		+	+	+	yes
Phypa_172697	Pp1s373_18V6.1	Pp3c21_16540V3.1	similar to Avr9/Cf-9 rapidly elicited protein 111B [Oryza sativa (japonica cultivar-group)]	AP2/EREBP	TF	yes					+	+		+	+	+	+	yes
Phypa_18841	Pp1s120_13V6.1	Pp3c10_11910V3.1	Dehydration-responsive element-binding protein 2A (DREB2A protein) [Arabidopsis thaliana]	AP2/EREBP	TF		yes				+	+	+				+	yes
Phypa_28324	Pp1s8_127V6.1		AP2 domain-containing transcription factor, putative [Arabidopsis thaliana]	AP2/EREBP	TF	yes				+	+	+	+		+		+	yes
Phypa_152159	Pp1s355_21V6.1	Pp3c1_33100V3.1	high mobility group (hmg1 2) family protein arid bright dna-binding domain-containing protein	ARID	TF						+							yes
Phypa_233854	Pp1s108_97V6.1	Pp3c12_21300V3.1		C2C2_CO-like	TF	yes	yes				+	+						yes
Phypa_135214	Pp1s118_226V6.1		Dof zinc finger protein DOF3.3 (AtDOF3.3) (H-protein promoter-binding factor 2a) [Arabidopsis thaliana]	C2C2_Dof	TF	yes					+	+						yes
Phypa_38844	Pp1s267_24V6.1		F1P2.50; Dof-type zinc finger domain-containing protein [Arabidopsis thaliana]	C2C2_Dof	TF	yes					+	+						yes
Phypa_8789	Pp1s370_63V6.1		transcription factor, putative [Arabidopsis thaliana]	CCAAT_HAP5	TF	yes		yes			+	+					+	yes
Phypa_86211	Pp1s144_73V6.1	Pp3c4_7260V3.1		HD-Zip	TF					+	+	+					+	yes
Phypa_18112	Pp1s141_56V6.1	Pp3c10_12560V3.1	zinc-binding family protein [Arabidopsis thaliana]	PLATZ	TF		yes				+	+	+			+	+	yes
Phypa_7262	Pp1s284_37V6.1	Pp3c4_12320V3.1	zinc-binding family protein [Arabidopsis thaliana]	PLATZ	TF		yes				+	+	+					yes
Phypa_160930	Pp1s28_82V6.1	Pp3c1_36580V3.1	RNA polymerase sigma factor rpoD1 [no tax name]	Sigma70-like	TR	yes					+							yes
Phypa_230140	Pp1s92_33V6.1	Pp3c22_18520V3.1	Plastid sigma factor PpSIG5	Sigma70-like	TR	yes					+	+					+	yes
Phypa_161316	Pp1s31_257V6.1	Pp3c11_21750V3.1	aspartate/glutamate/uridylate kinase family protein [Arabidopsis thaliana]	Trihelix	TF						+							yes
Phypa_27666	Pp1s25_89V6.1	Pp3c3_14260V3.1	nadp-specific isocitrate dehydrogenase	CCAAT_Hap3	TF							+						yes
